# Supplementary material for: Enhanced thermoelectric properties of the Dirac semimetal Cd3As2
Source: Royal Society of Chemistry journal article supplement (doi:10.1039/c6qi00383d), 2016-01-01
Supplement: c6qi00383d1.pdf [file c6qi00383d1.pdf]

Electronic supplementary information

**Enhanced Thermoelectric Properties of Dirac Semimetal  $\text{Cd}_3\text{As}_2$**

*Tong Zhou<sup>1,2</sup>, Cheng Zhang<sup>1,3</sup>, Huisheng Zhang<sup>1,2</sup>, Faxian Xiu<sup>1,3</sup>, and Zhongqin*

*Yang<sup>1,2,3\*</sup>*

1 State Key Laboratory of Surface Physics and Department of Physics, Fudan

University, Shanghai 200433, China

2 Key Laboratory for Computational Physical Sciences (MOE), Fudan University,

Shanghai 200433, China

3 Collaborative Innovation Center of Advanced Microstructures, Fudan University,

Shanghai, 200433, China

\*Address correspondence to: [zyang@fudan.edu.cn](mailto:zyang@fudan.edu.cn)

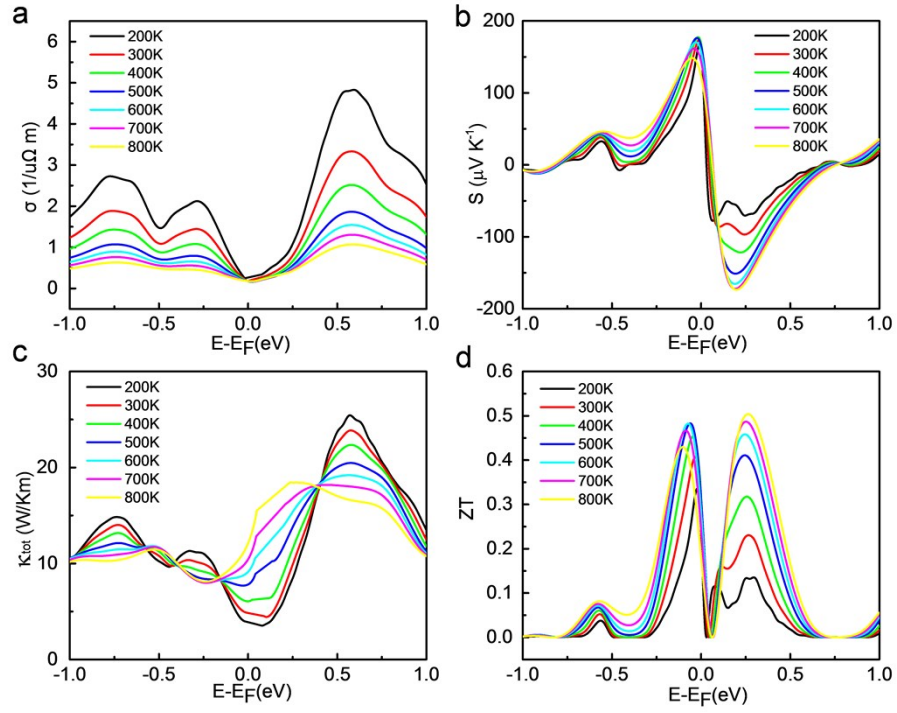

**Fig. S1.** (a)-(d) Calculated electrical conductivity ( $\sigma$ ), Seebeck coefficient ( $S$ ), thermal conductivity ( $\kappa$ ), and figure of merit ( $ZT$ ) of n/p-type  $\text{Cd}_3\text{As}_2$  with respect to the chemical potential at different temperatures.

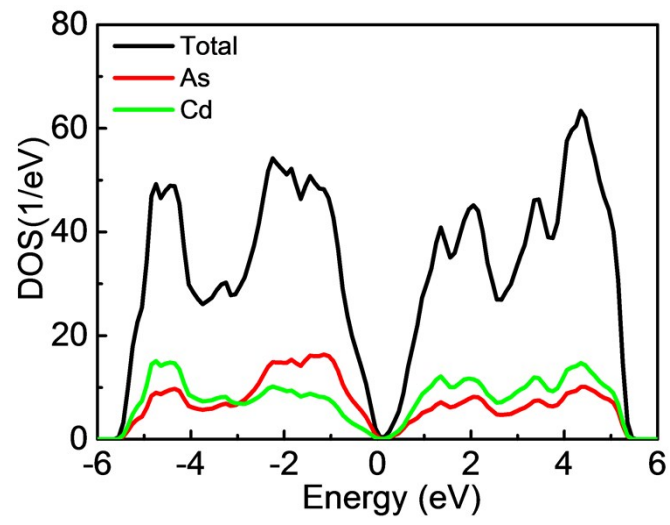

**Fig. S2.** Calculated densities of states for Cd<sub>3</sub>As<sub>2</sub> crystal by using PBE method with SOC considered.
